# Supplementary material for: Functional crosstalk between mTORC1/p70S6K pathway and heterochromatin organization in stress-induced senescence of MSCs
Source: PubMed Central journal article supplement (PMC7359252; doi:10.1186/s13287-020-01798-1), 2020-07-13

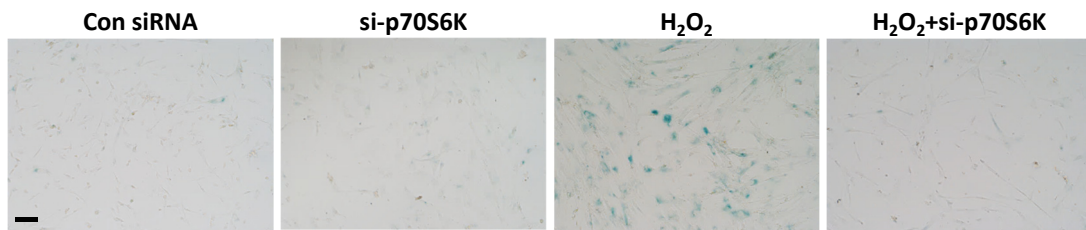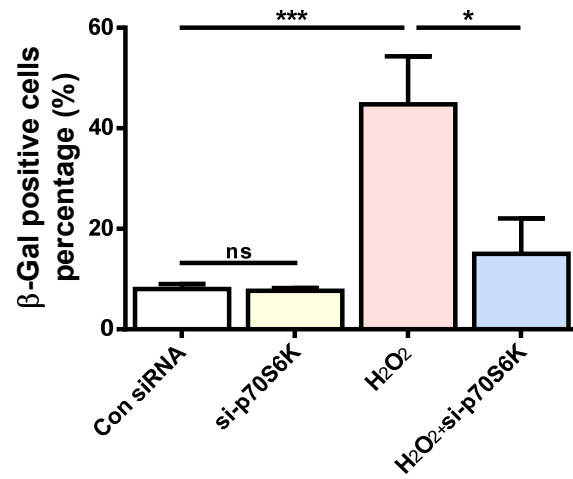

A

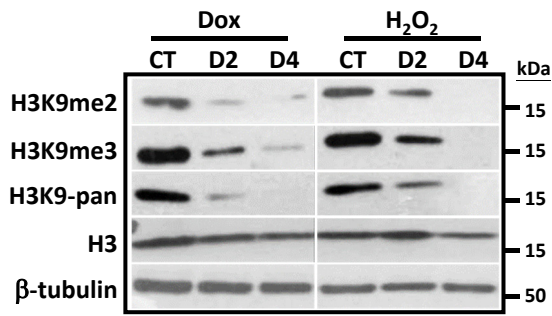

B

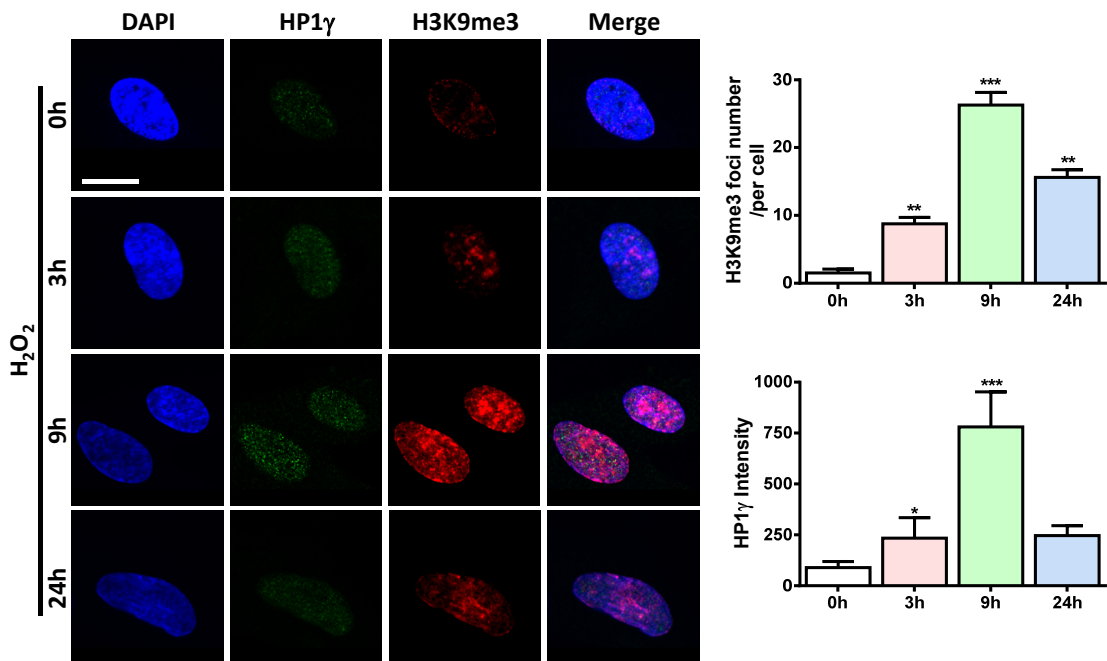

C

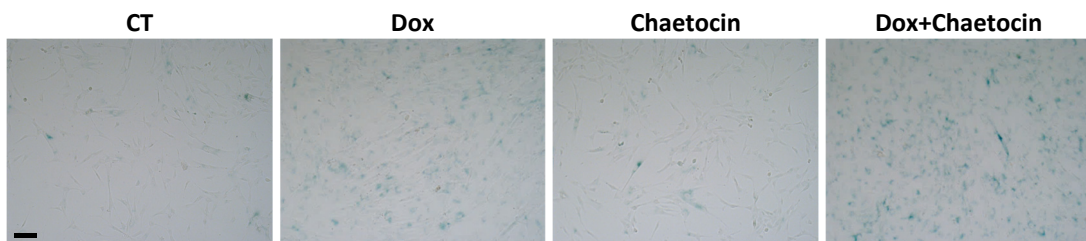

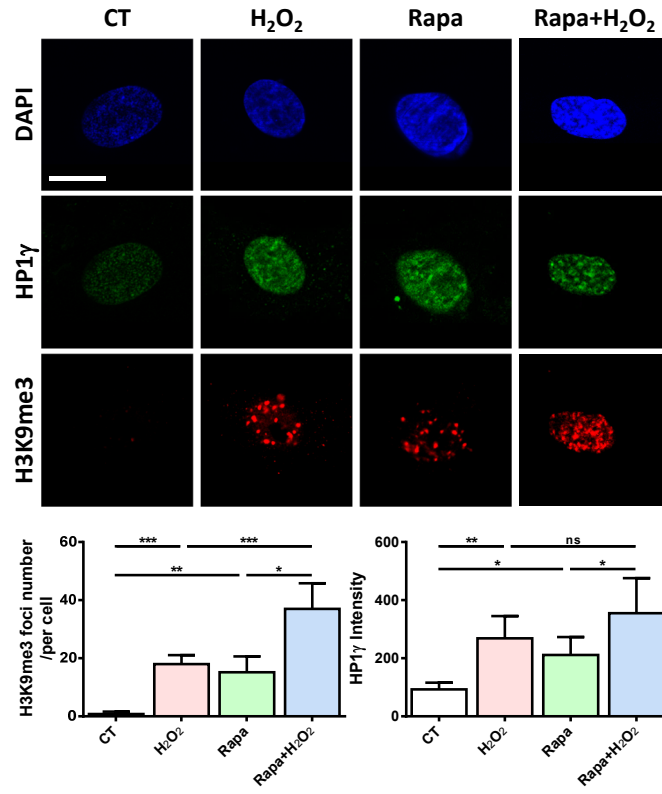

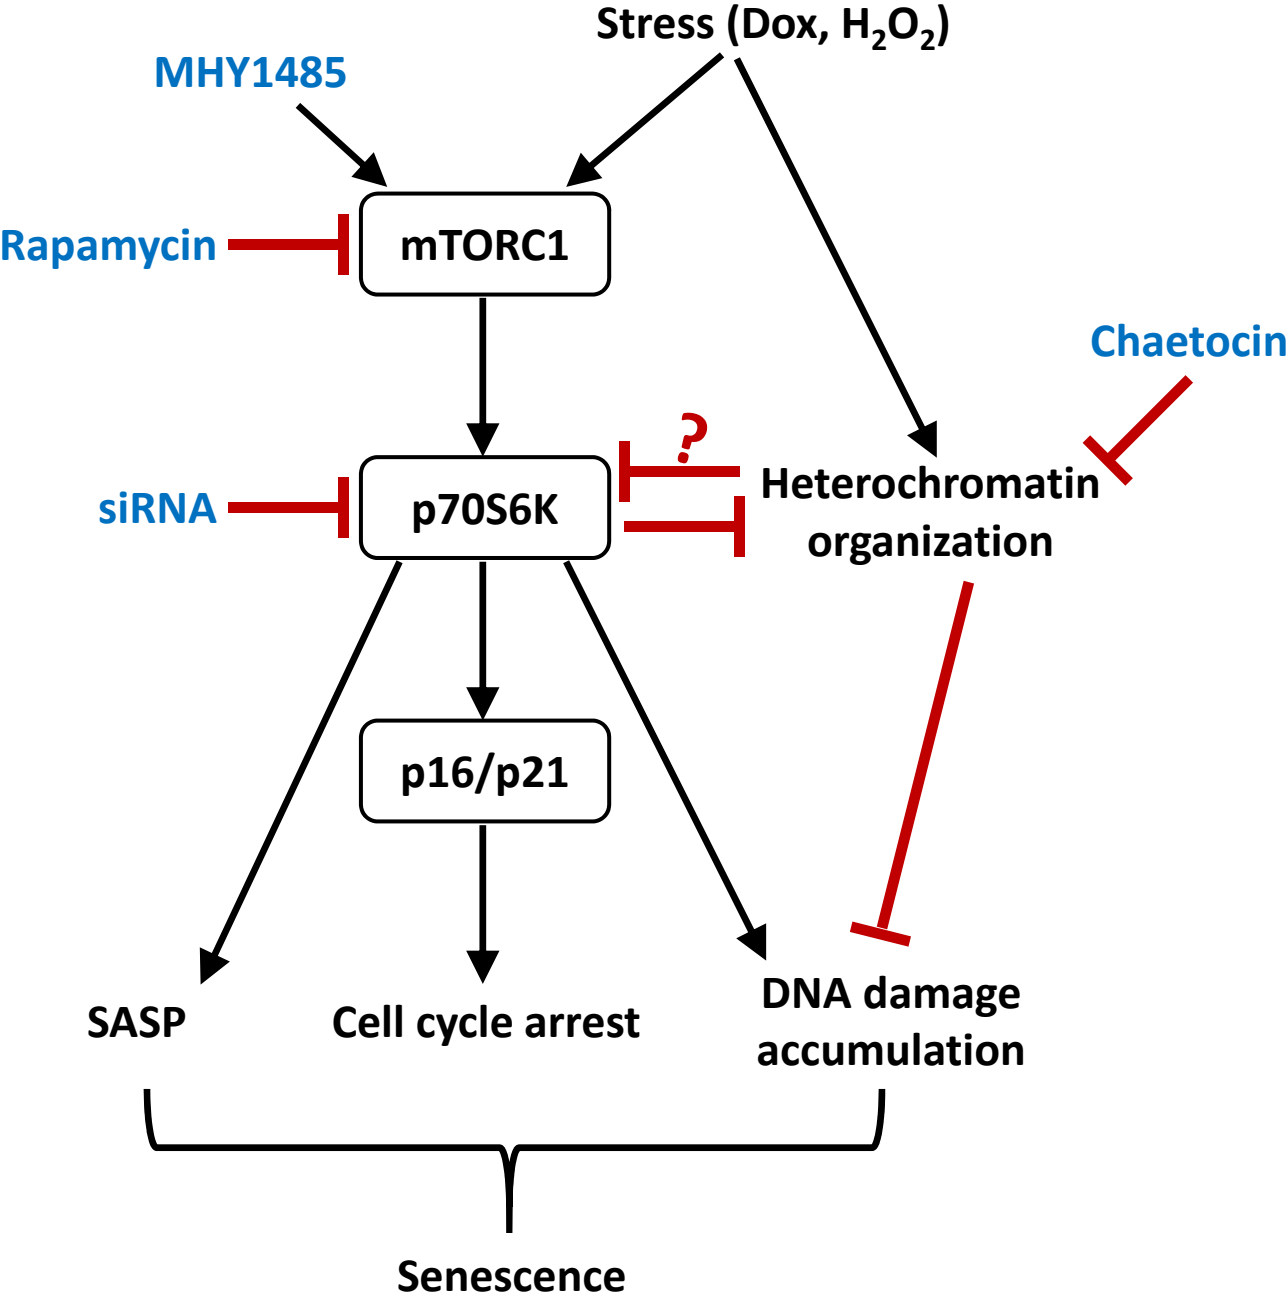

Supplement: 13287_2020_1798_MOESM1_ESM.pdf [file 13287_2020_1798_MOESM1_ESM.pdf]
