# Supplementary material for: Functional crosstalk between mTORC1/p70S6K pathway and heterochromatin organization in stress-induced senescence of MSCs
Source: PubMed Central journal article supplement (PMC7359252; doi:10.1186/s13287-020-01798-1), 2020-07-13
Supplement: 13287_2020_1798_MOESM2_ESM.pdf [file 13287_2020_1798_MOESM2_ESM.pdf]

**Supplementary Table 1: Primers used in this study****Primers for qPCR**

| <b>Target</b>   | <b>Forward primer (5' to 3')</b> | <b>Reverse primer (5' to 3')</b> |
|-----------------|----------------------------------|----------------------------------|
| h p15           | GGGGACTAGTGGAGAAGGTG             | GGTGAGAGTGGCAGGGTC               |
| h p16           | CTTCCTGGACACGCTGGT               | CATGGTTACTGCCTCTGGTG             |
| h p21           | CGACTGTGATGCGCTAATGG             | CTGCCTCCTCCCAACTCATC             |
| h IL-1 $\alpha$ | AGATGCCTGAGATACCCAAAACC          | CCAAGCACACCCAGTAGTCT             |
| h IL-1 $\beta$  | ATGATGGCTTATTACAGTGGCAA          | GTCGGAGATTCGTAGCTGGA             |
| h IL-6          | ACTCACCTCTTCAGAACGAATTG          | CCATCTTTGGAAGGTTTCAGGTTG         |
| h Ccl-2         | CAGCCAGATGCAATCAATGCC            | CAGCCAGATGCAATCAATGCC            |
| h Cxcl-10       | GTGGCATTCAAGGAGTACCTC            | GCCTTCGATTCTGGATTGAG             |
| h p53           | GAGGTTGGCTCTGACTGTACC            | TCCGTCCCAGTAGATTACCAC            |
| r p15/INK4b     | TCACCAGACCTGTGCATGAT             | AGGCGTCACACACATCCAG              |
| r p16/INK4a     | ACCAAACGCCCCGAACA                | GAGAGCTGCCACTTTGACGT             |
| r p21/CIP1      | CAGCCACAGGCACCATGTC              | ACAGACGACGGCATACTTTGC            |
| r p53           | CCCAGGGAGTGCAAAGAGAG             | TCTCGGAACATCTCGAAGCG             |

**Supplementary Table 2: The antibodies used in this study**

| <b>Antibody name</b>        | <b>Company</b>            | <b>Catalogue number</b> |
|-----------------------------|---------------------------|-------------------------|
| mTOR                        | Cell Signaling Technology | Cat.No.2972S            |
| mTOR                        | Millipore                 | Cat. No. 04-385         |
| phospho-mTOR                | Abcam                     | Cat.No.ab109268         |
| phospho-mTOR                | Cell Signaling Technology | Cat.No.5536S            |
| p70s6k                      | Cell Signaling Technology | Cat.No.9202S            |
| phospho-p70s6k              | Cell Signaling Technology | Cat.No.9234S            |
| 4EBP1                       | Cell Signaling Technology | Cat.No.#9644            |
| phosph-4EBP1                | Cell Signaling Technology | Cat.No.2855             |
| Tubulin                     | Santa Cruz                | Cat.No.sc-5274          |
| H3K9me3                     | Cell Signaling Technology | Cat.No.#13969           |
| H3K9me2,3                   | Cell Signaling Technology | Cat.No.5327             |
| HP1- $\gamma$               | Merck Millipore           | Cat.No.MABE656          |
| Phosphor-H <sub>2</sub> A.X | Cell Signaling Technology | Cat.No.#2577            |
